# Supplementary material for: Evaluation of the Immunosafety of Cucurbit[n]uril In Vivo
Source: Preprints.org preprint supplement (doi:10.20944/preprints202312.0715.v1), 2023-12-11
Supplement: Supplementary file 3 [file supplementary]

Supplementary material for article

Evaluation of the Immunosafety of Cucurbit[n]uril In Vivo

Ekaterina Pashkina 1,2, Alina Aktanova 1,2, Olga Boeva 1, Maria Bykova 1, Elena Gavrilova 1, Elena Goiman 1, Ekaterina Kovalenko 3,*, Na’il Saleh 4, Lyubov Grishina 1, and Vladimir Kozlov 1

1 Research Institute of Fundamental and Clinical Immunology, 14, Yadrintsevskaya st., 630099 Novosi-birsk, Russia; pashkina.e.a@yandex.ru (E.P.), aktanova_al@yandex.ru (A.A.), starchenko-va97@gmail.com (O.B.), maria18021997@mail.ru (M.B.), edav.gavr@mail.ru (E.Ga.), l.goiman@mail.ru (E.Go.), l_grishina@bk.ru (L.G.), vakoz40@yandex.ru (V.K.)

2 Novosibirsk State Medical University, 52, Krasny Prospect, 630091 Novosibirsk, Russia

3 Nicolaev Institute of Inorganic Chemistry, 630090 Novosibirsk, Russia; e.a.kovalenko@niic.nsc.ru

4 Department of Chemistry, College of Science, United Arab Emirates University, P.O. Box 15551, Al Ain, United Arab Emirates; n.saleh@uaeu.ac.ae

***** Correspondence: pashkina.e.a@yandex.ru

Blood count

1. Red blood cells

1. hemoglobin level

1. platelets
